# Supplementary material
Source: PubMed Central journal article supplement (PMC9212690)

# Figure S7

## A CKD

| sample id | patient id | time point | cohort   | Maximum COVID-19 severity grade | Maximum COVID-19 severity grade according to WHO scale | age | sex | ethnicity | center             | heart disease | lung-associated disorder | immune disorder | chronic kidney disease | cancer | hyper-tension | obesity | type 2 diabetes mellitus | comorbidities in detail                                                                                          |
|-----------|------------|------------|----------|---------------------------------|--------------------------------------------------------|-----|-----|-----------|--------------------|---------------|--------------------------|-----------------|------------------------|--------|---------------|---------|--------------------------|------------------------------------------------------------------------------------------------------------------|
| 015       | 7          | t1         | COVID-19 | 3                               | 4                                                      | 53  | f   | Caucasian | Tuebingen, Germany | no            | yes                      | no              | yes                    | no     | no            | no      | no                       | Chronic kidney disease, smoking                                                                                  |
| 016       | 7          | t4         | COVID-19 | 3                               | 4                                                      | 53  | f   | Caucasian | Tuebingen, Germany | no            | yes                      | no              | yes                    | no     | no            | no      | no                       | Chronic kidney disease, smoking                                                                                  |
| 023       | 12         | t2         | COVID-19 | 6                               | 8                                                      | 83  | f   | Caucasian | Tuebingen, Germany | yes           | no                       | no              | yes                    | yes    | yes           | yes     | yes                      | Gastric cancer, coronary artery disease, type 2 diabetes mellitus, hypertension, obesity, chronic kidney disease |
| 024       | 13         | t3         | COVID-19 | 5                               | 6                                                      | 79  | m   | Caucasian | Tuebingen, Germany | no            | no                       | no              | yes                    | no     | yes           | no      | no                       | Renal insufficiency, hypertension                                                                                |
| 025       | 13         | t5         | COVID-19 | 5                               | 6                                                      | 79  | m   | Caucasian | Tuebingen, Germany | no            | no                       | no              | yes                    | no     | yes           | no      | no                       | Renal insufficiency, hypertension                                                                                |
| 027       | 15         | t5         | COVID-19 | 5                               | 6                                                      | 70  | m   | Caucasian | Tuebingen, Germany | no            | no                       | yes             | yes                    | no     | yes           | no      | yes                      | Kidney transplant, type 2 diabetes mellitus, hypertension                                                        |
| 034       | 19         | t2         | COVID-19 | 6                               | 8                                                      | 78  | m   | Caucasian | Tuebingen, Germany | no            | no                       | no              | yes                    | no     | yes           | no      | yes                      | Dialysis due to renal insufficiency, type 2 diabetes mellitus, hypertension                                      |
| 035       | 19         | t4         | COVID-19 | 6                               | 8                                                      | 78  | m   | Caucasian | Tuebingen, Germany | no            | no                       | no              | yes                    | no     | yes           | no      | yes                      | Dialysis due to renal insufficiency, type 2 diabetes mellitus, hypertension                                      |
| 036       | 19         | t5         | COVID-19 | 6                               | 8                                                      | 78  | m   | Caucasian | Tuebingen, Germany | no            | no                       | no              | yes                    | no     | yes           | no      | yes                      | Dialysis due to renal insufficiency, type 2 diabetes mellitus, hypertension                                      |
| 042       | 25         | t1         | COVID-19 | 5                               | 6                                                      | 51  | m   | Caucasian | Toulouse, France   | yes           | no                       | yes             | yes                    | no     | no            | no      | yes                      | Kidney transplant, type 2 diabetes mellitus, ischemic cardiomyopathy, Fallot cardiopathy                         |
| 043       | 25         | t2         | COVID-19 | 5                               | 6                                                      | 51  | m   | Caucasian | Toulouse, France   | yes           | no                       | yes             | yes                    | no     | no            | no      | yes                      | Kidney transplant, type 2 diabetes mellitus, ischemic cardiomyopathy, Fallot cardiopathy                         |
| 044       | 25         | t5         | COVID-19 | 5                               | 6                                                      | 51  | m   | Caucasian | Toulouse, France   | yes           | no                       | yes             | yes                    | no     | no            | no      | yes                      | Kidney transplant, type 2 diabetes mellitus, ischemic cardiomyopathy, Fallot cardiopathy                         |
| 062       | 33         | t1         | COVID-19 | 3                               | 4                                                      | 75  | f   | Caucasian | Toulouse, France   | no            | no                       | no              | yes                    | no     | yes           | no      | yes                      | Type 2 diabetes mellitus, hypertension, chronic renal insufficiency                                              |
| 063       | 33         | t2         | COVID-19 | 3                               | 4                                                      | 75  | f   | Caucasian | Toulouse, France   | no            | no                       | no              | yes                    | no     | yes           | no      | yes                      | Type 2 diabetes mellitus, hypertension, chronic renal insufficiency                                              |
| 064       | 33         | t3         | COVID-19 | 3                               | 4                                                      | 75  | f   | Caucasian | Toulouse, France   | no            | no                       | no              | yes                    | no     | yes           | no      | yes                      | Type 2 diabetes mellitus, hypertension, chronic renal insufficiency                                              |
| 065       | 33         | t4         | COVID-19 | 3                               | 4                                                      | 75  | f   | Caucasian | Toulouse, France   | no            | no                       | no              | yes                    | no     | yes           | no      | yes                      | Type 2 diabetes mellitus, hypertension, chronic renal insufficiency                                              |

B

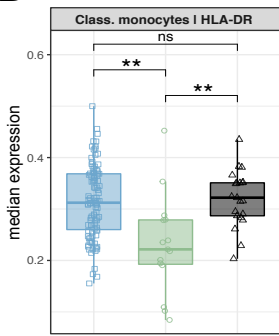

C

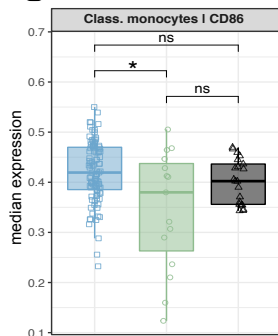

D

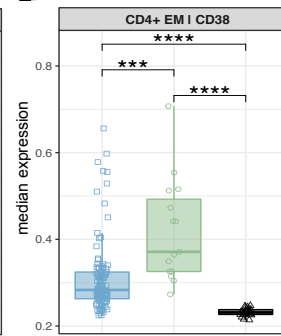

E

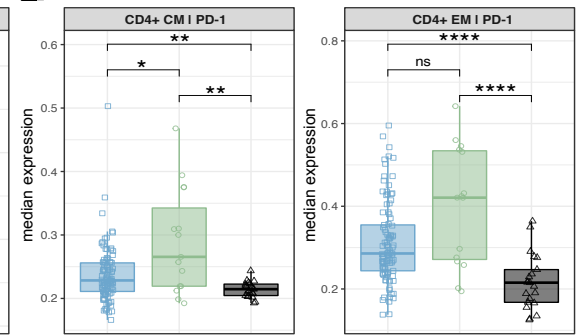

F

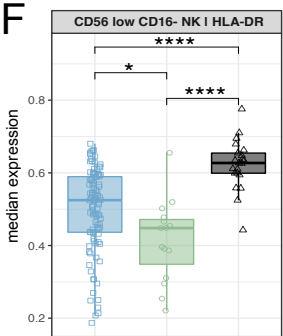

G immune disorder

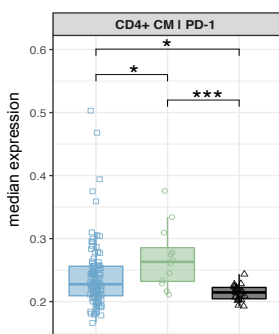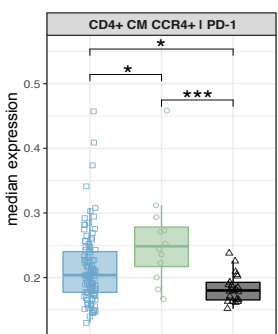

H

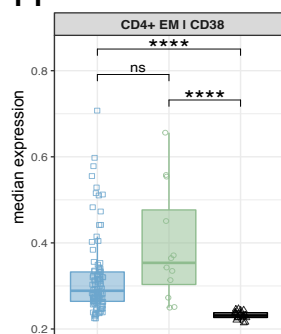

I

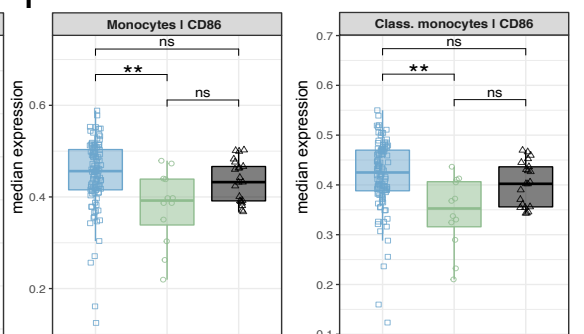

Supplement: mmc8.pdf [file mmc8.pdf]
