# Supplementary material
Source: PubMed Central journal article supplement (PMC9212690)

Figure S1

A

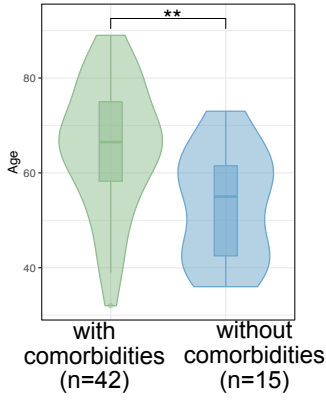

B

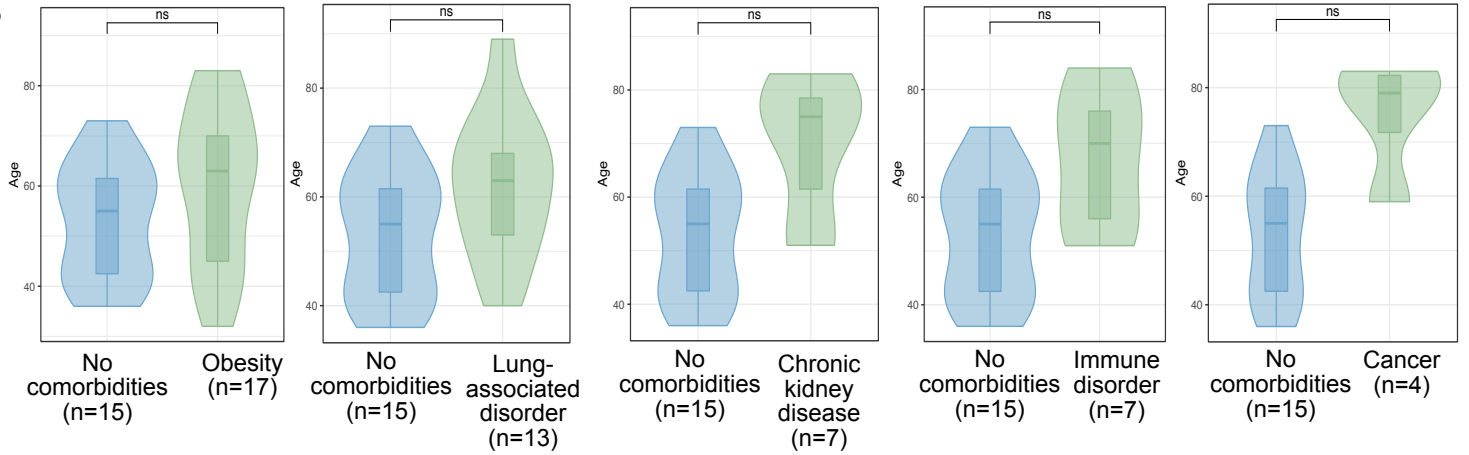

C

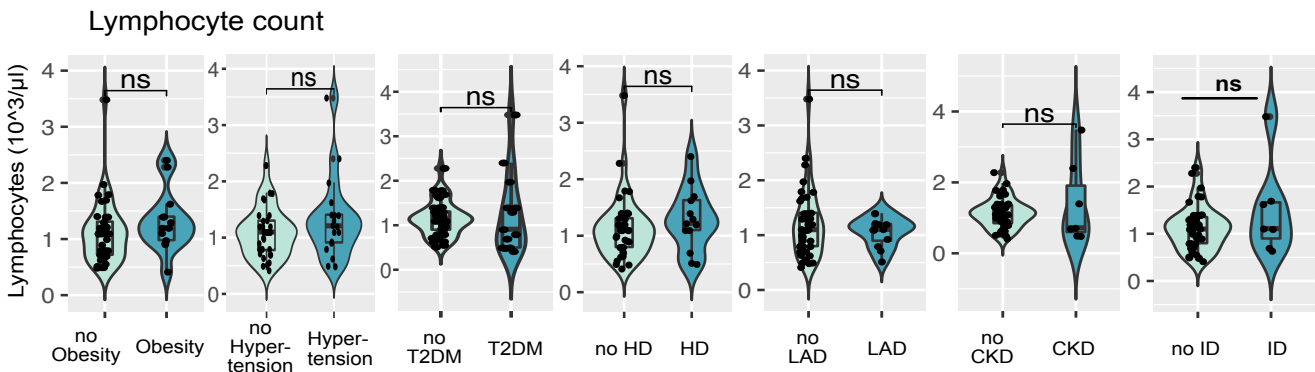

D

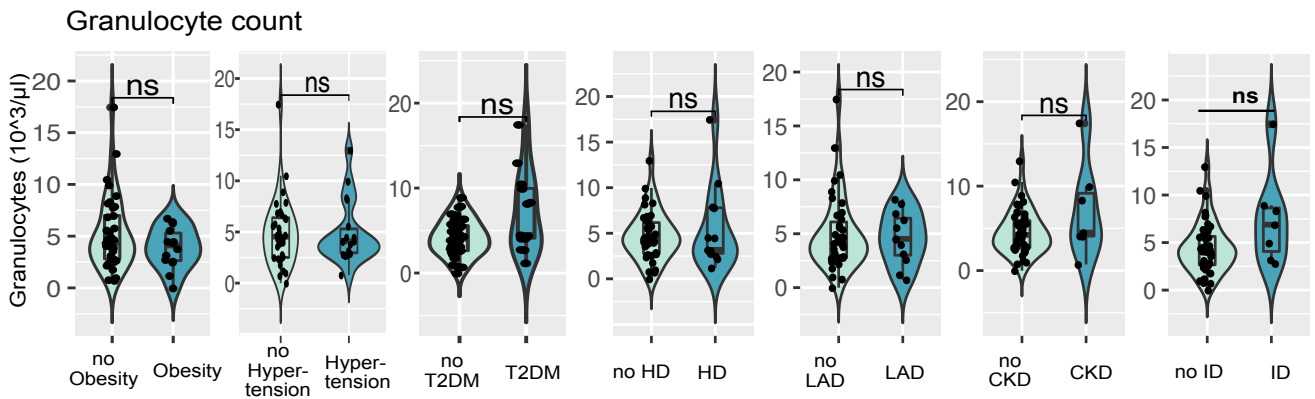

Supplement: mmc2.pdf [file mmc2.pdf]

Figure S2

A

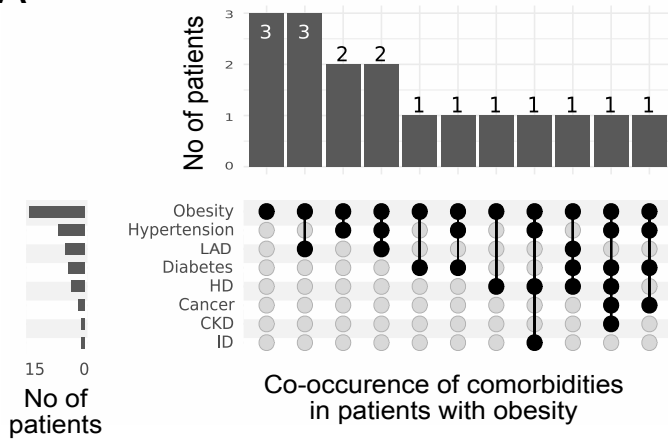

B

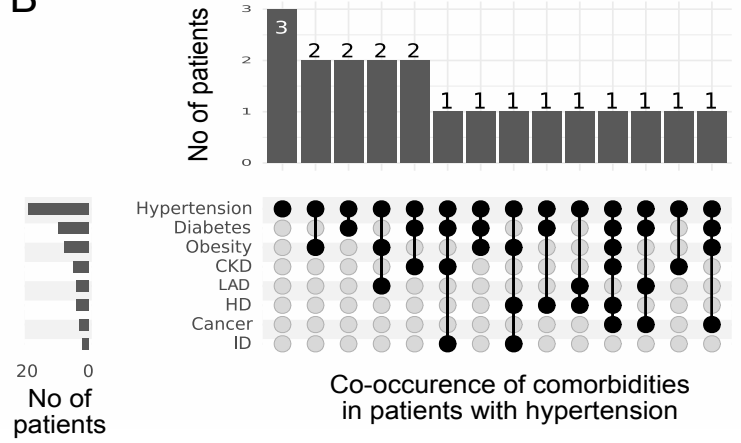

C

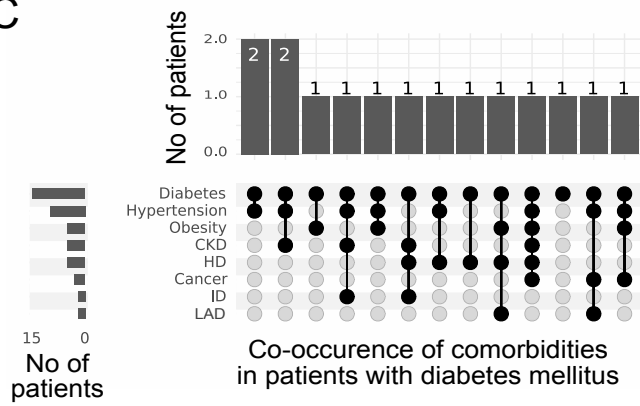

D

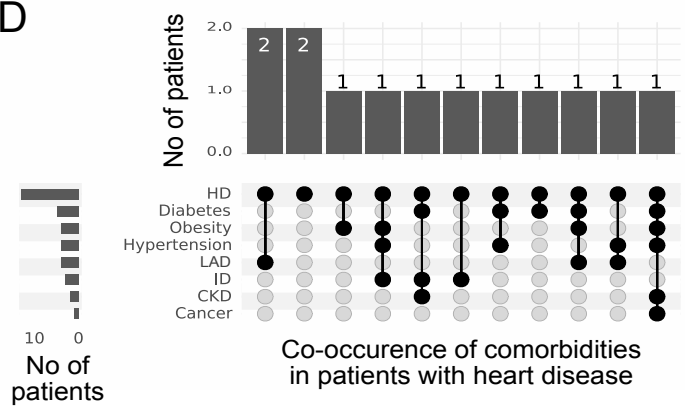

E

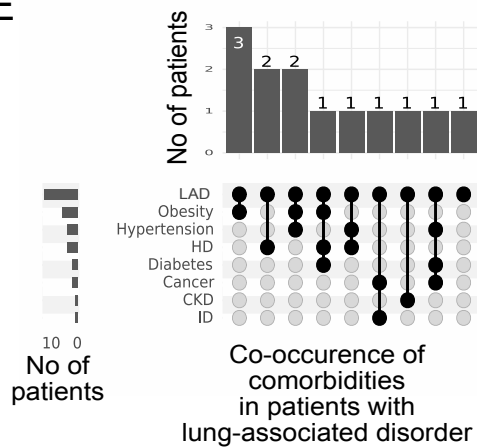

F

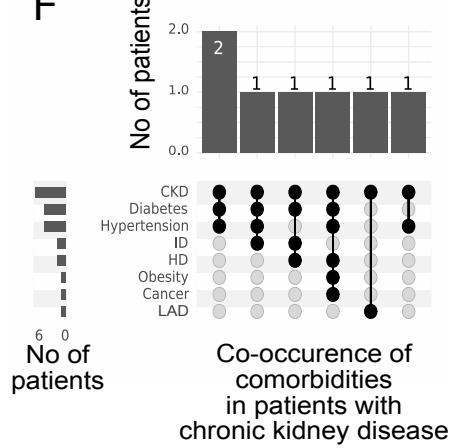

G

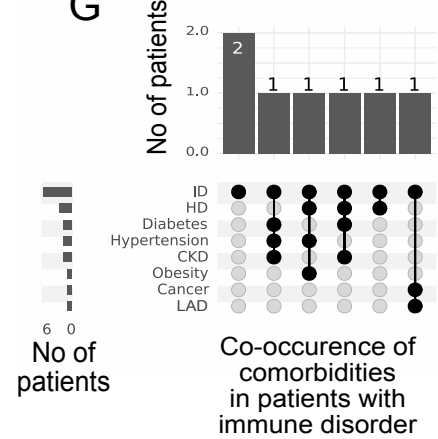

H

severe COVID-19 associated immune features

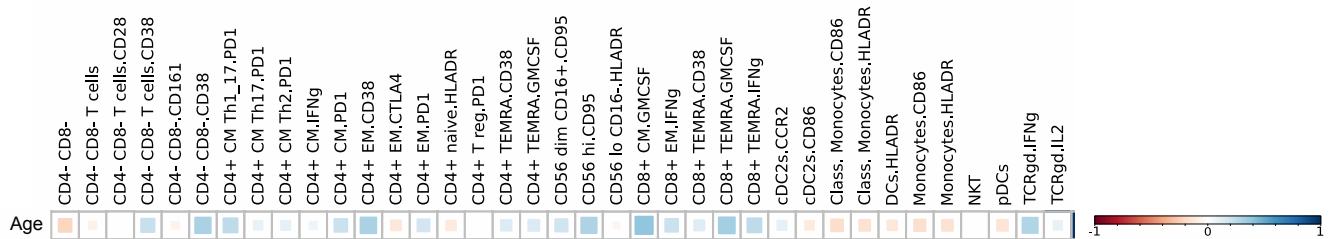

I

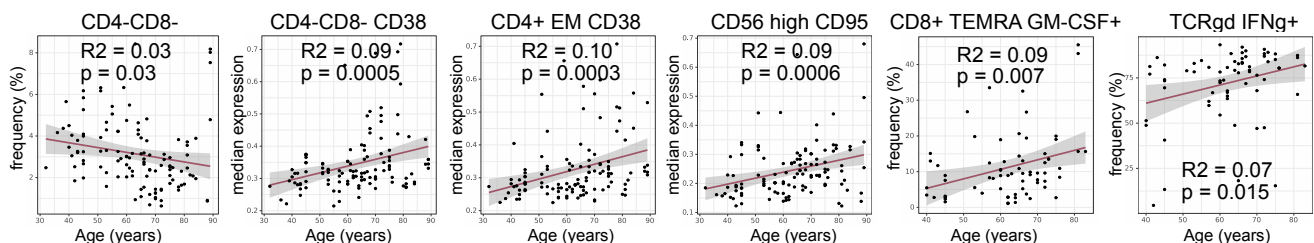

Supplement: mmc3.pdf [file mmc3.pdf]

Figure S3

COVID-19s associated immune features

A

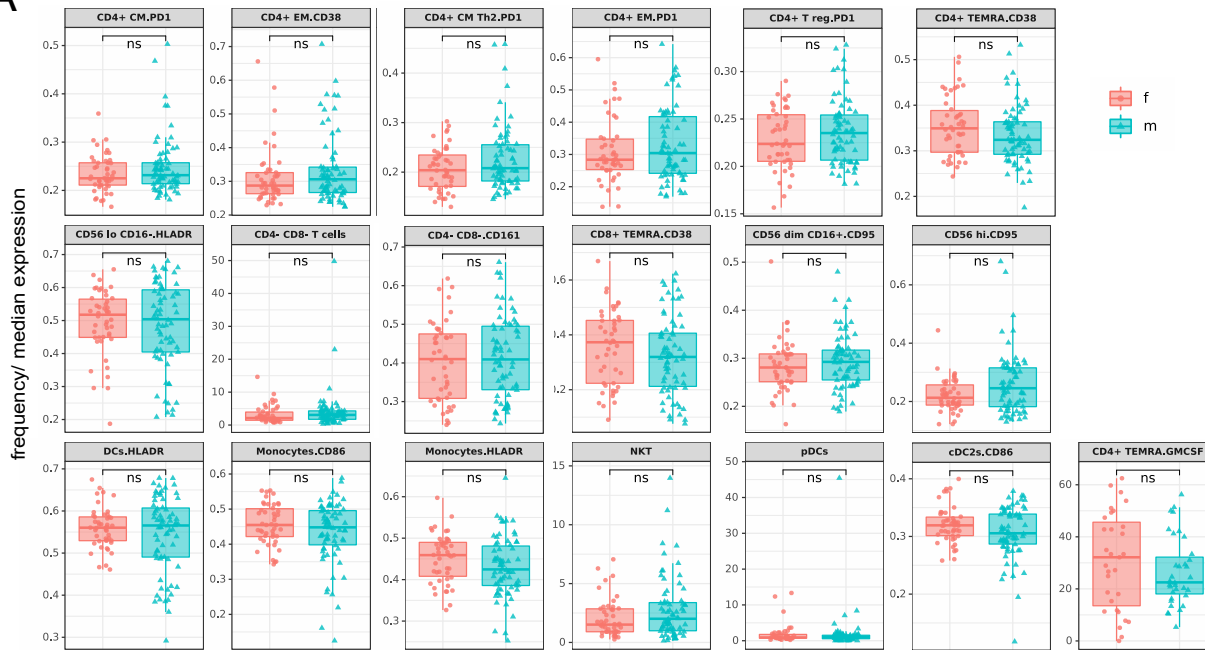

B

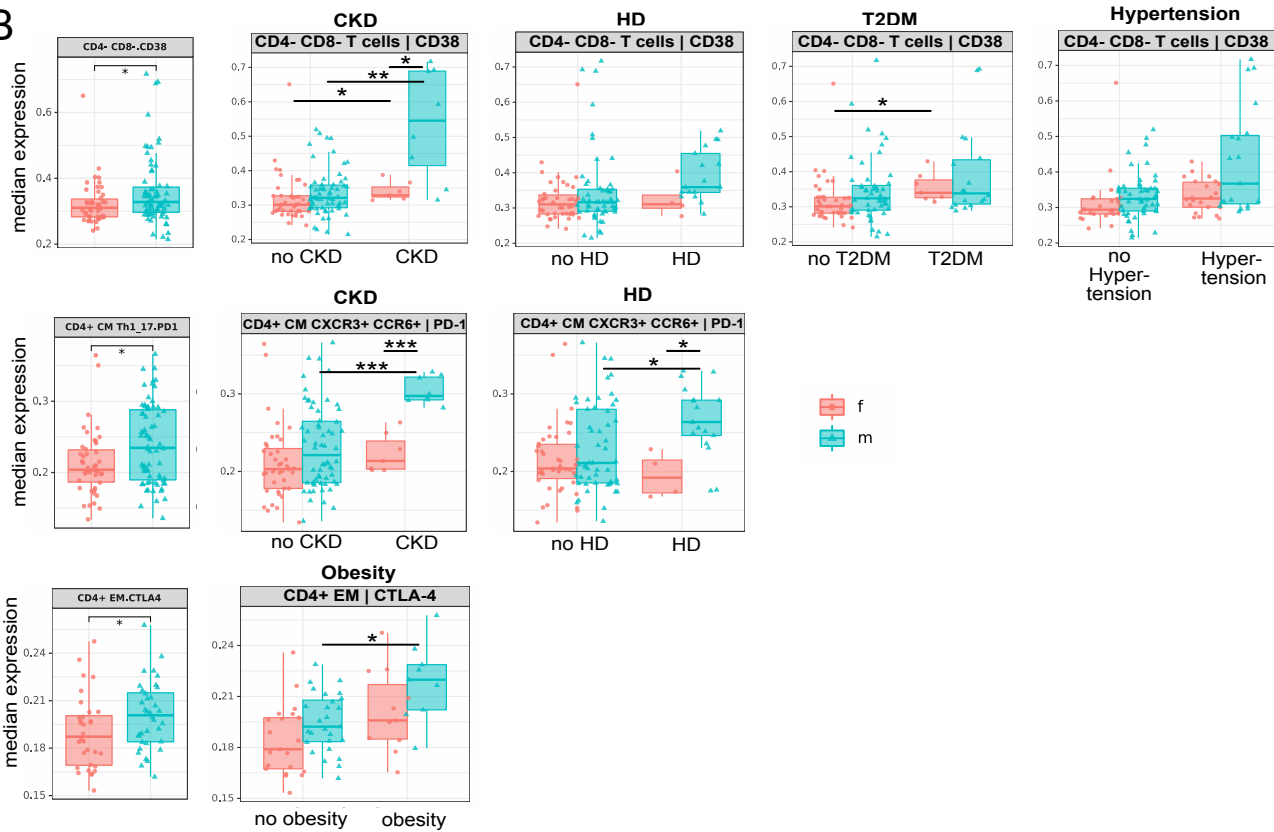

C

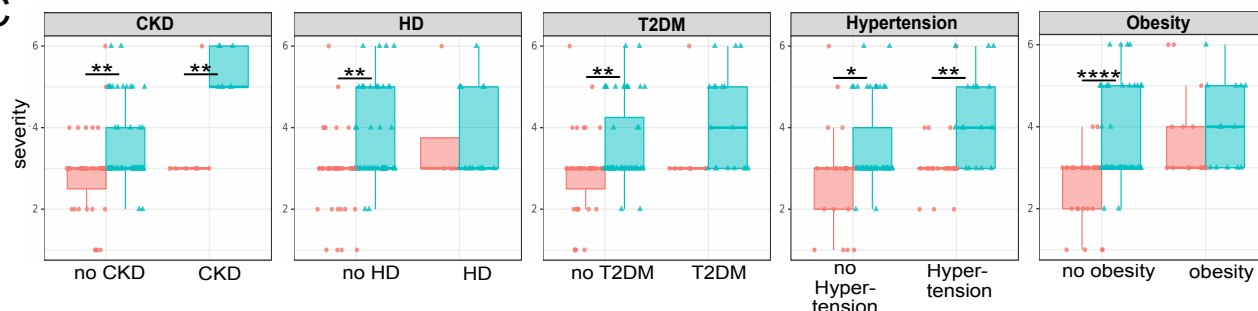

Supplement: mmc4.pdf [file mmc4.pdf]

Figure S4

A

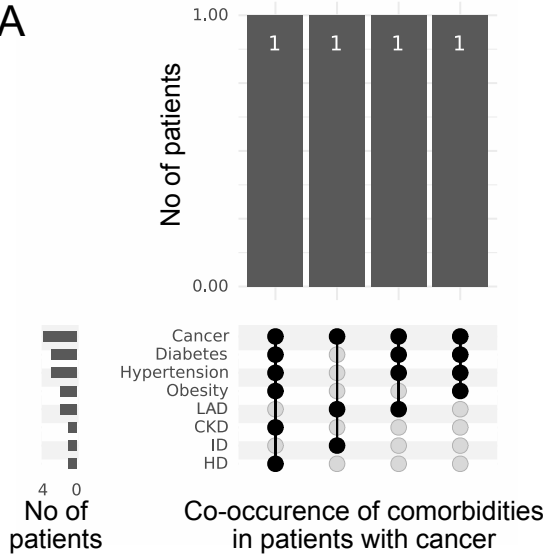

B

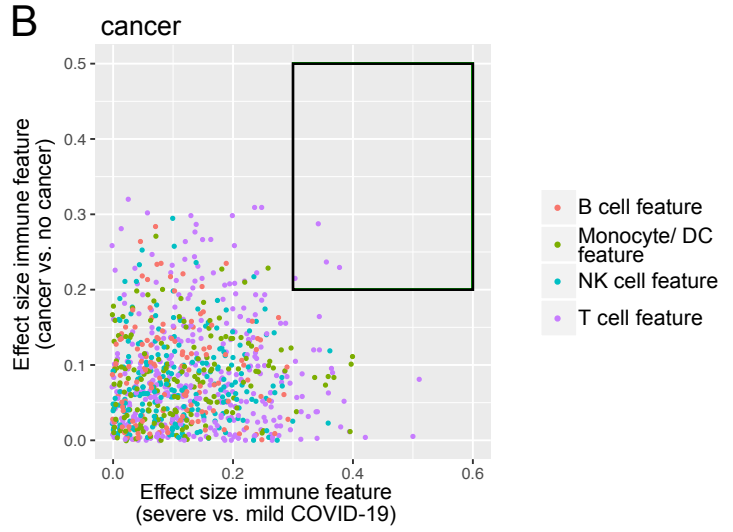

C

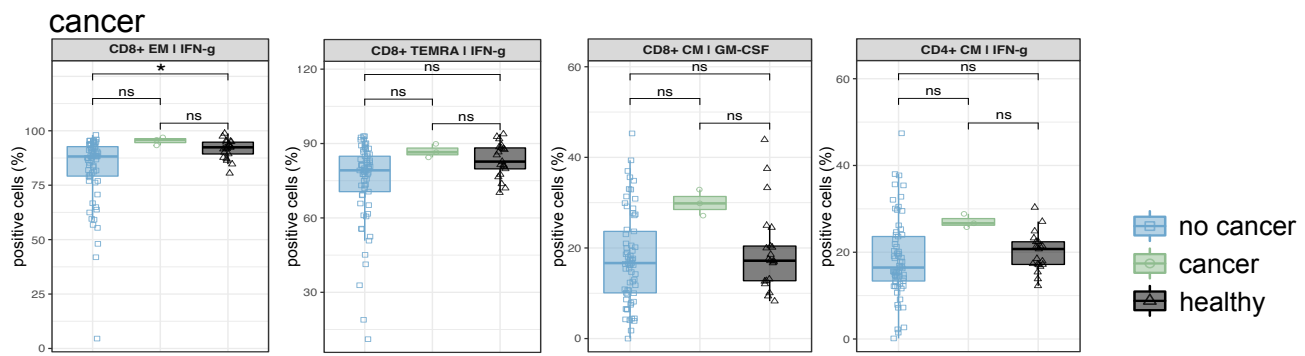

Supplement: mmc5.pdf [file mmc5.pdf]

Figure S5

A obesity

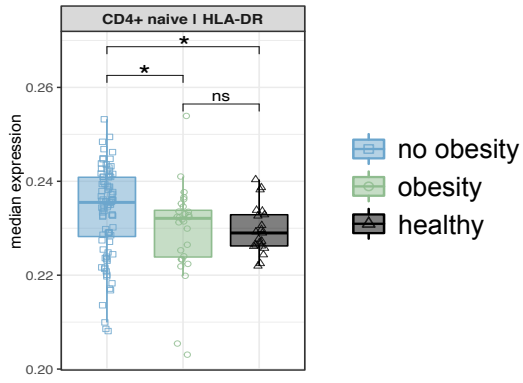

B hypertension

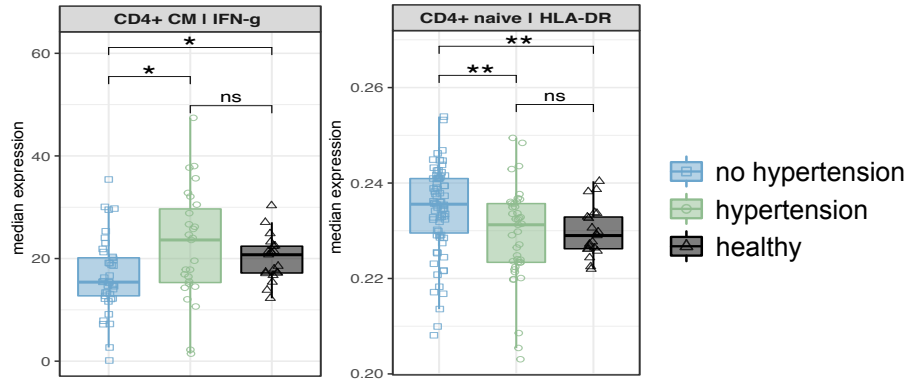

C type 2 diabetes mellitus

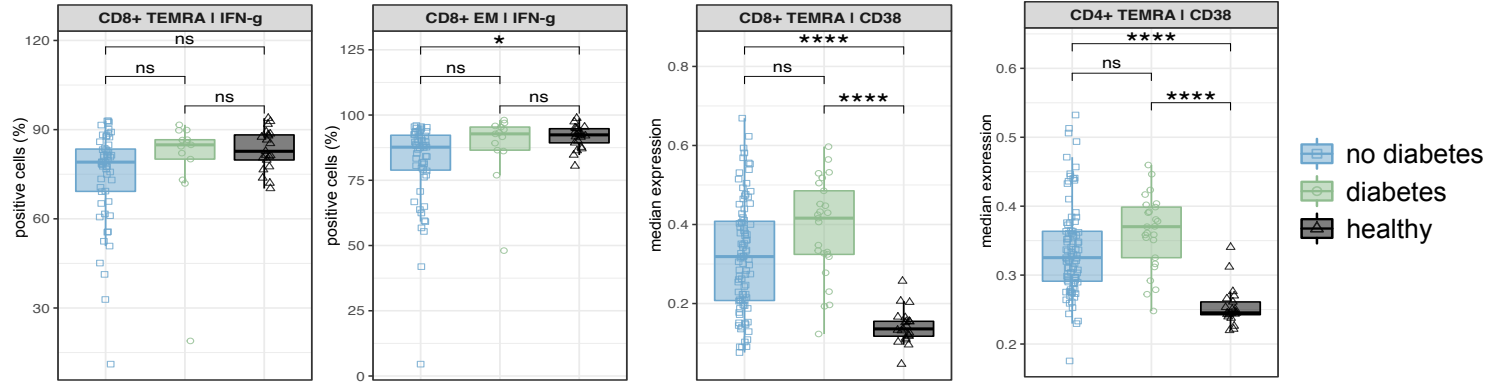

Supplement: mmc6.pdf [file mmc6.pdf]

Figure S6

A lung-associated disorder

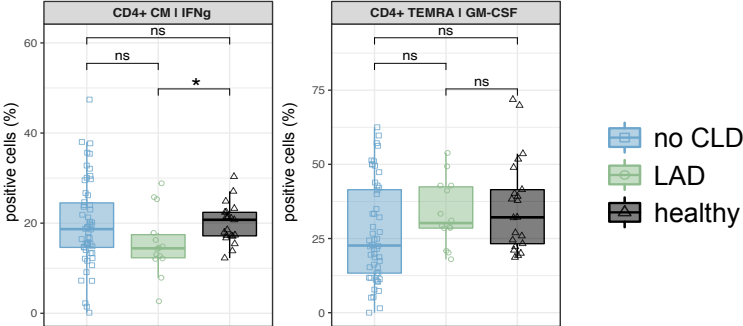

Supplement: mmc7.pdf [file mmc7.pdf]
